# Supplementary material for: Anti-Inflammatory Polyketides from an Alga-Derived Fungus Aspergillus ochraceopetaliformis SCSIO 41020
Source: MDPI journal article supplement (doi:10.3390/md20050295), 2022-04-27
Supplement: s1 [file s1]

## Supporting Information

### Anti-inflammatory compounds from the alga-derived fungus

### *Aspergillus ochraceopetaliformis* SCSIO 41020

Chunmei Chen<sup>1,2#</sup>, Xue Ren<sup>3#</sup>, Huaming Tao<sup>4</sup>, Wenteng Cai<sup>4</sup>, Yuchi Chen<sup>4</sup>, Xiaowei Luo<sup>5\*</sup>, Peng Guo<sup>3\*</sup>, and Yonghong Liu<sup>1,2,5\*</sup>

<sup>1</sup> CAS Key Laboratory of Tropical Marine Bio-Resources and Ecology/Guangdong Key Laboratory of Marine Materia Medica, South China Sea Institute of Oceanology, Chinese Academy of Sciences, Guangzhou 510301, China; chenchunmei18@mailsucas.ac.cn

<sup>2</sup> University of Chinese Academy of Sciences, Beijing 100049, China

<sup>3</sup> Capital Institute of Pediatrics, Beijing 100020, China; rxue0529@163.com

<sup>4</sup> Guangdong Provincial Key Laboratory of Chinese Medicine Pharmaceutics, School of Traditional Chinese Medicine, Southern Medical University, Guangzhou 510515, China; taohm@smu.edu.cn (H.T.); cwt0825@163.com (W.C.); cyc11136456@163.com (Y.C.)

<sup>5</sup> Institute of Marine Drugs, Guangxi University of Chinese Medicine, Nanning 530200, China

\* Correspondence: luoxiaowei1991@126.com (X.L.); guopeng\_chcip@163.com (P.G.); yonghongliu@scsio.ac.cn (Y.L.)

† These authors contributed equally to this work.

## Table of Contents

|                                                                                                                                   |    |
|-----------------------------------------------------------------------------------------------------------------------------------|----|
| <b>The physicochemical data of the known compounds 2–6</b> .....                                                                  | 3  |
| <b>Figure S1.</b> <sup>1</sup> H NMR spectrum of aspormisin A ( <b>1</b> ) in DMSO- <i>d</i> <sub>6</sub> .....                   | 4  |
| <b>Figure S2.</b> <sup>13</sup> C NMR spectrum of aspormisin A ( <b>1</b> ) in DMSO- <i>d</i> <sub>6</sub> .....                  | 4  |
| <b>Figure S3.</b> HSQC spectrum of aspormisin A ( <b>1</b> ) in DMSO- <i>d</i> <sub>6</sub> .....                                 | 5  |
| <b>Figure S4.</b> HMBC spectrum of aspormisin A ( <b>1</b> ) in DMSO- <i>d</i> <sub>6</sub> .....                                 | 5  |
| <b>Figure S5.</b> <sup>1</sup> H– <sup>1</sup> H COSY spectrum of aspormisin A ( <b>1</b> ) in DMSO- <i>d</i> <sub>6</sub> . .... | 6  |
| <b>Figure S6.</b> NOESY spectrum of aspormisin A ( <b>1</b> ). ....                                                               | 6  |
| <b>Figure S7.</b> HRESIMS spectrum of aspormisin A ( <b>1</b> ). ....                                                             | 7  |
| <b>Figure S8.</b> IR spectrum of aspormisin A ( <b>1</b> ). ....                                                                  | 7  |
| <b>Figure S9.</b> UV spectrum of aspormisin A ( <b>1</b> ) in MeOH.....                                                           | 8  |
| <b>Figure S10.</b> The structure and ORTEP diagram of TMC-151s. ....                                                              | 8  |
| <b>ECD Calculation Details for 2</b> .....                                                                                        | 9  |
| <b>Table S1.</b> Energies of <b>2</b> at MMFF94 force field. ....                                                                 | 9  |
| <b>Table S2.</b> Energies of <b>2</b> at B3LYP/6–31+g(d) level in methanol.....                                                   | 9  |
| <b>Figure S11.</b> The The optimized conformers and equilibrium populations of <b>2</b> . ....                                    | 10 |
| <b>The strain's (<i>Aspergillus ochraceopetaliformis</i> SCSIO 41020) ITS sequence of the rDNA</b> .....                          | 11 |
| <b>Figure S12.</b> Effect on cell viability of compounds 1–6 in RAW264.7 cells at the dose of 10 μM.<br>.....                     | 11 |
| <b>Table S3.</b> Primers used in qPCR.....                                                                                        | 11 |

## The physicochemical data of the known compounds 2–6

5,9-Dihydroxy-2,4,6,8,10-pentamethyldodeca-2,6,10-trienal (**2**): white, amorphous solid;  $[\alpha]_{\text{D}}^{25} +16$  (*c* 0.01, CH<sub>3</sub>OH); <sup>1</sup>H NMR (500 MHz, DMSO-*d*<sub>6</sub>)  $\delta$  9.39 (1H, s, H-1), 6.58 (1H, dd, *J* = 9.5, 1.5 Hz, H-3), 5.42 – 5.31 (1H, m, H-11), 5.27 (1H, dd, *J* = 9.0, 1.5 Hz, H-7), 3.77 (1H, d, *J* = 7.5 Hz, H-5), 3.60 (1H, d, *J* = 7.5 Hz, H-9), 2.79 (1H, qd, *J* = 7.0, 2.5 Hz, H-4), 1.68 (3H, d, *J* = 1.0 Hz, H<sub>3</sub>-13), 1.58–1.55 (6H, m, H<sub>3</sub>-12, H<sub>3</sub>-15), 1.53 (3H, t, *J* = 1.0 Hz, H<sub>3</sub>-17), 0.87 (3H, d, *J* = 7.0 Hz, H<sub>3</sub>-14), 0.76 (3H, d, *J* = 6.9 Hz, H<sub>3</sub>-16). <sup>13</sup>C NMR (125 MHz, DMSO-*d*<sub>6</sub>)  $\delta$  195.4 (C-1), 159.2 (C-3), 137.9 (C-2), 137.5 (C-10), 135.6 (C-6), 130.7 (C-7), 119.6 (C-11), 80.6 (C-9), 80.1 (C-5), 37.3 (C-4), 35.7 (C-8), 17.7 (C-16), 16.5 (C-14), 12.8 (C-17), 11.6 (C-15), 11.2 (C-12), 9.2 (C-13).

(+)-(9*R*,10*E*,12*E*)-9-Methoxyoctadecadienoic acid (**3**): white, amorphous solid;  $[\alpha]_{\text{D}}^{25} +20$  (*c* 0.01, CH<sub>3</sub>OH); <sup>1</sup>H NMR (500 MHz, DMSO-*d*<sub>6</sub>)  $\delta$  12.00 (1H, brs, COOH), 6.16 (1H, dd, *J* = 15.0, 10.5 Hz, H-11), 6.06 (1H, dd, *J* = 15.0, 10.5 Hz, H-12), 5.72 (1H, dt, *J* = 15.0, 7.0 Hz, H-13), 5.39 (1H, dd, *J* = 15.0, 8.0 Hz, H-10), 3.53 (1H, q, *J* = 7.0 Hz, H-9), 3.14 (3H, s, H<sub>3</sub>-19), 2.20 (2H, td, *J* = 7.5, 3.0 Hz, H<sub>2</sub>-2), 2.06 (2H, m, H-14), 1.50 (3H, m, H-3, 8a), 1.36 (1H, t, *J* = 6.5 Hz, H-8b), 1.26 (14H, m, H<sub>2</sub>-4, 5, 6, 7, 15, 16, 17), 0.87 (3H, td, *J* = 7.0, 3.5 Hz, H-18); <sup>13</sup>C NMR (125 MHz, DMSO-*d*<sub>6</sub>)  $\delta$  174.5 (C-1), 134.7 (C-13), 132.4 (C-11), 131.7 (C-10), 129.5 (C-12), 81.2 (C-9), 55.4 (C-19), 35.1 (C-8), 33.7 (C-2), 32.0 (C-14), 31.2 (C-17), 29.0 (C-15), 28.6 (C-7, 6), 28.5 (C-5, 4), 24.5 (C-3), 22.1 (C-16), 13.9 (C-18).

Saccharonol A (**4**): yellow oil; <sup>1</sup>H NMR (500 MHz, Methanol-*d*<sub>4</sub>)  $\delta$  6.31 (1H, s, H-4), 6.30 (1H, d, *J* = 2.0 Hz, H-5), 6.28 (1H, d, *J* = 2.0 Hz, H-7), 2.23 (3H, s, H<sub>3</sub>-9); <sup>13</sup>C NMR (125 MHz, Methanol-*d*<sub>4</sub>)  $\delta$  167.8 (C-6), 167.3 (C-1), 164.9 (C-8), 155.5 (C-3), 141.5 (C-4a), 105.5 (C-5), 103.4 (C-7), 102.4 (C-4), 99.5 (C-8a), 19.2 (C-9).

(3*R*, 4*S*)-(-)-4-Hydroxymellein (**5**): colorless crystal;  $[\alpha]_{\text{D}}^{25} -15$  (*c* 0.01, CH<sub>3</sub>OH); <sup>1</sup>H NMR (500 MHz, Methanol-*d*<sub>4</sub>)  $\delta$  7.56 (1H, dd, *J* = 8.5, 7.5 Hz, H-6), 7.07 (1H, d, *J* = 7.5 Hz, H-7), 6.93 (1H, dd, *J* = 8.5, 1.0 Hz, H-5), 4.56 (2H, m, H-3, 4), 1.47 (3H, d, *J* = 6.0 Hz, H<sub>3</sub>-9); <sup>13</sup>C NMR (125 MHz, Methanol-*d*<sub>4</sub>)  $\delta$  170.2 (C-1), 162.9 (C-8), 144.1 (C-4a), 137.8 (C-6), 117.7 (C-5), 117.7 (C-7), 108.0 (C-8a), 81.6 (C-3), 69.5 (C-4), 18.2 (C-9).

(3*R*, 4*R*)-(-)-4-Hydroxymellein (**6**): colorless crystal;  $[\alpha]_{\text{D}}^{25} -27$  (*c* 0.01, CH<sub>3</sub>OH); <sup>1</sup>H NMR (500 MHz, Methanol-*d*<sub>4</sub>)  $\delta$  7.55 (1H, dd, *J* = 8.5, 7.5 Hz, H-6), 6.98 (1H, d, *J* = 1.1 Hz, H-7), 6.96 (1H, s, H-5), 4.72 (1H, qd, *J* = 6.5, 2.0 Hz, H-3), 4.55 (1H, d, *J* = 2.0 Hz, H-4), 1.52 (3H, d, *J* = 6.5 Hz, H-9); <sup>13</sup>C NMR (125 MHz, Methanol-*d*<sub>4</sub>)  $\delta$  171.0 (C-1), 162.9 (C-8), 143.1 (C-4a), 137.7 (C-6), 119.8 (C-5), 118.4 (C-7), 108.4 (C-8a), 80.0 (C-3), 67.6 (C-4), 16.3 (C-9).

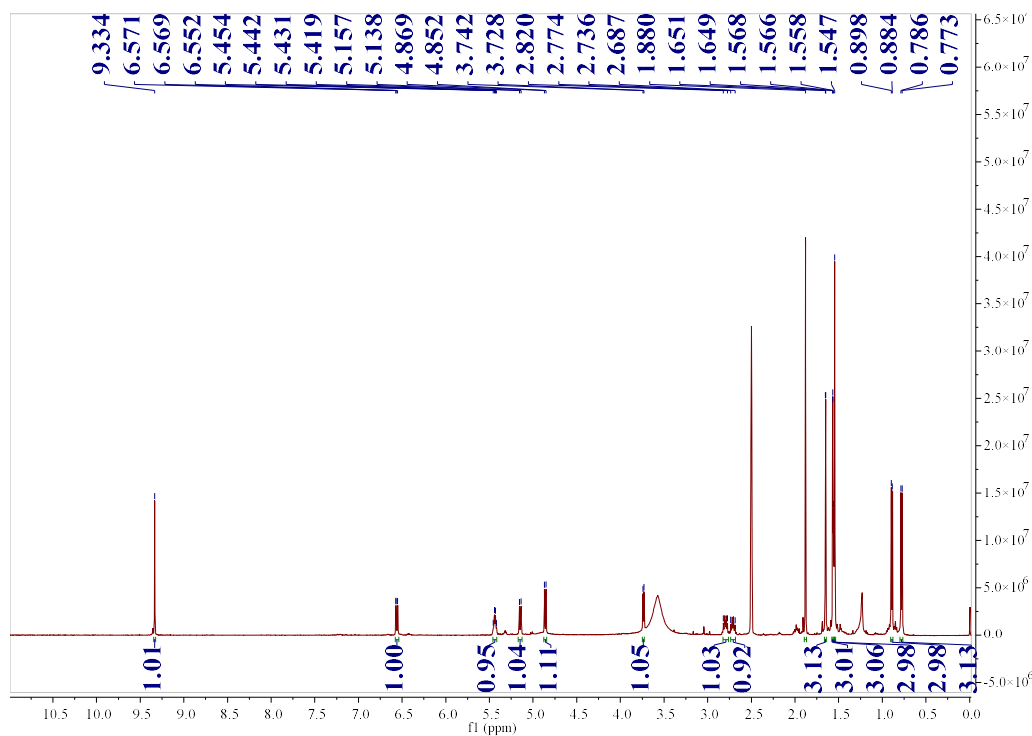

**Figure S1.** <sup>1</sup>H NMR spectrum of aspormisin A (1) in DMSO-*d*<sub>6</sub>.

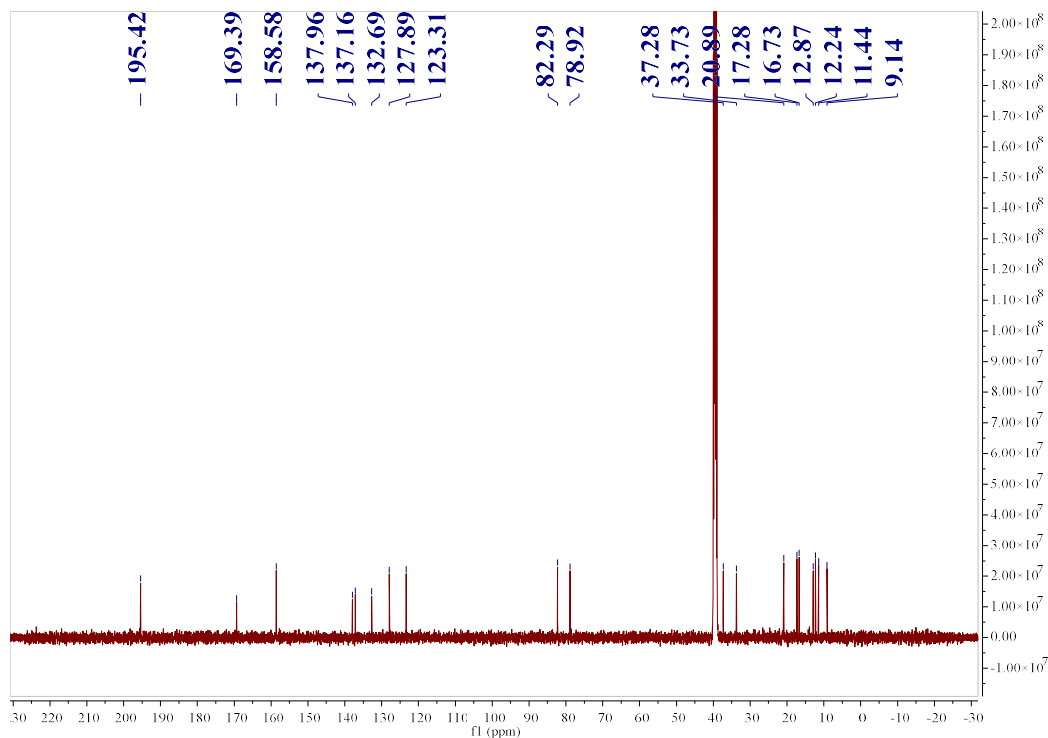

**Figure S2.** <sup>13</sup>C NMR spectrum of aspormisin A (1) in DMSO-*d*<sub>6</sub>.

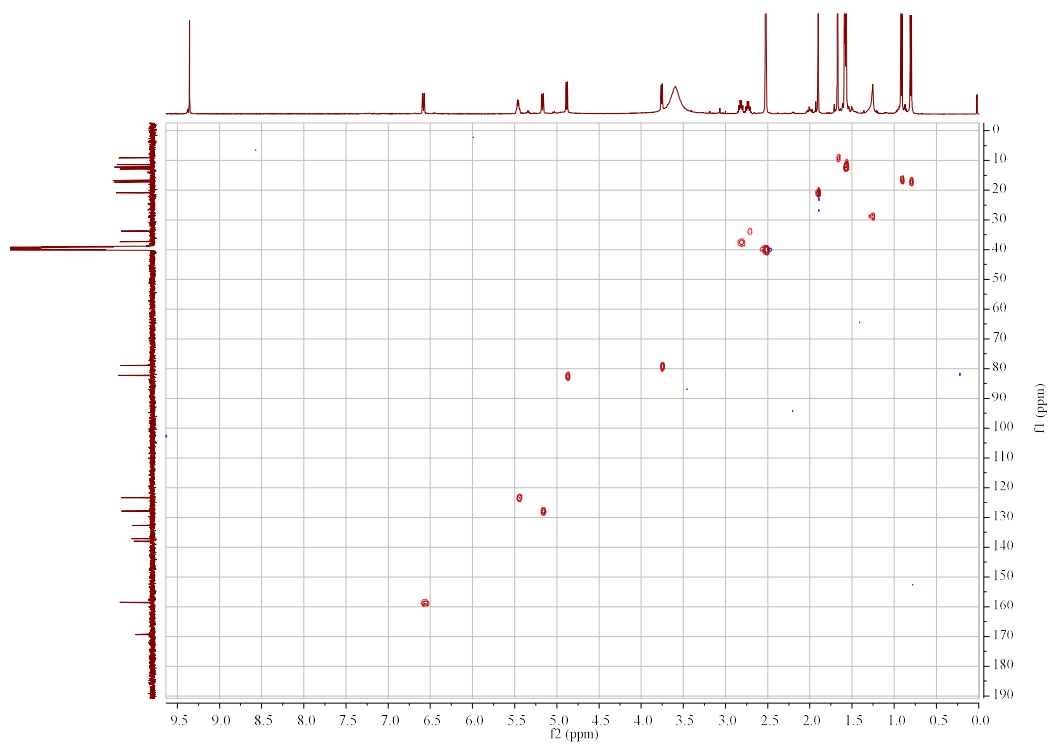

**Figure S3.** HSQC spectrum of aspormisin A (**1**) in DMSO-*d*<sub>6</sub>.

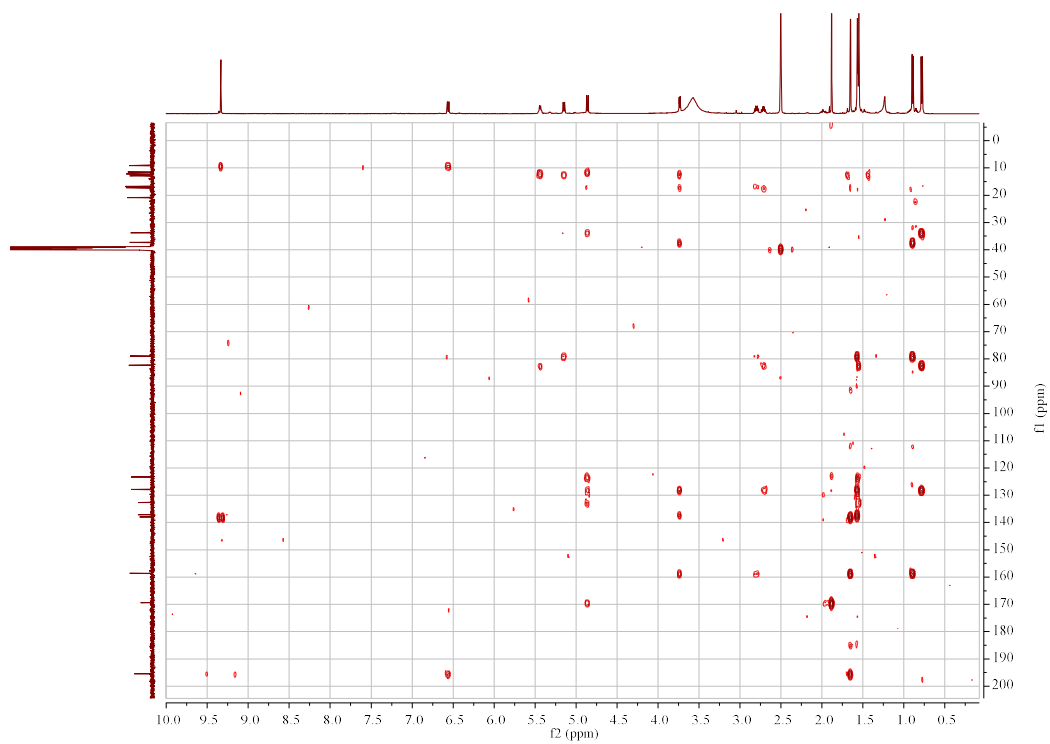

**Figure S4.** HMBC spectrum of aspormisin A (**1**) in DMSO-*d*<sub>6</sub>.

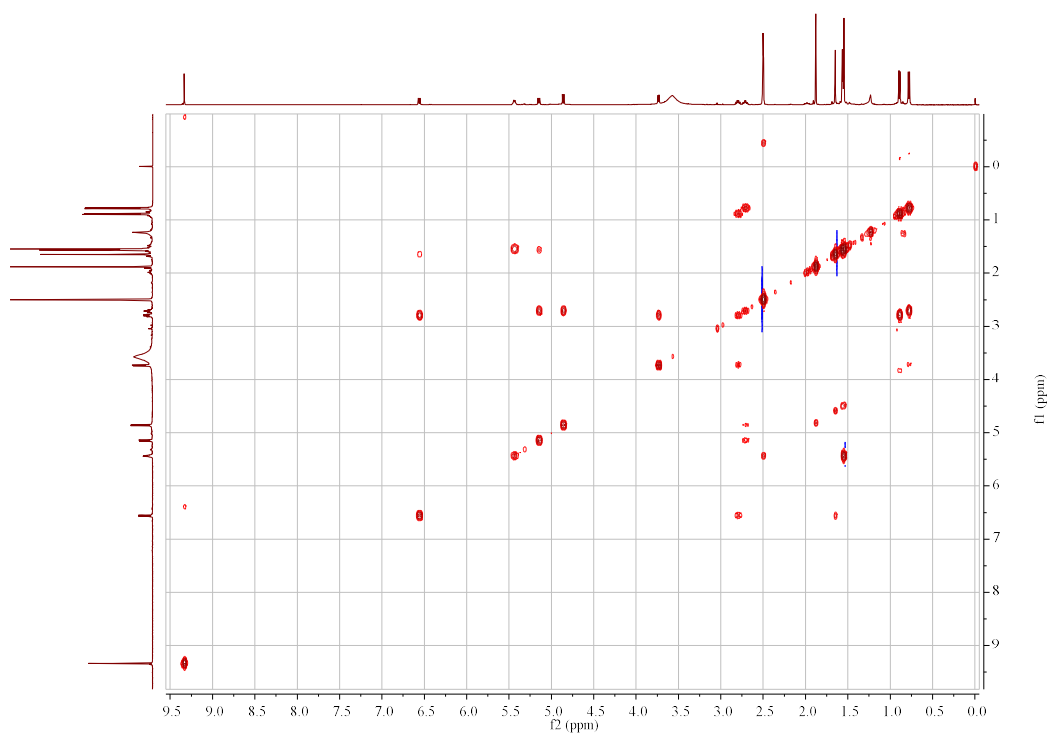

**Figure S5.**  $^1\text{H}$ - $^1\text{H}$  COSY spectrum of aspormisin A (**1**) in  $\text{DMSO-}d_6$ .

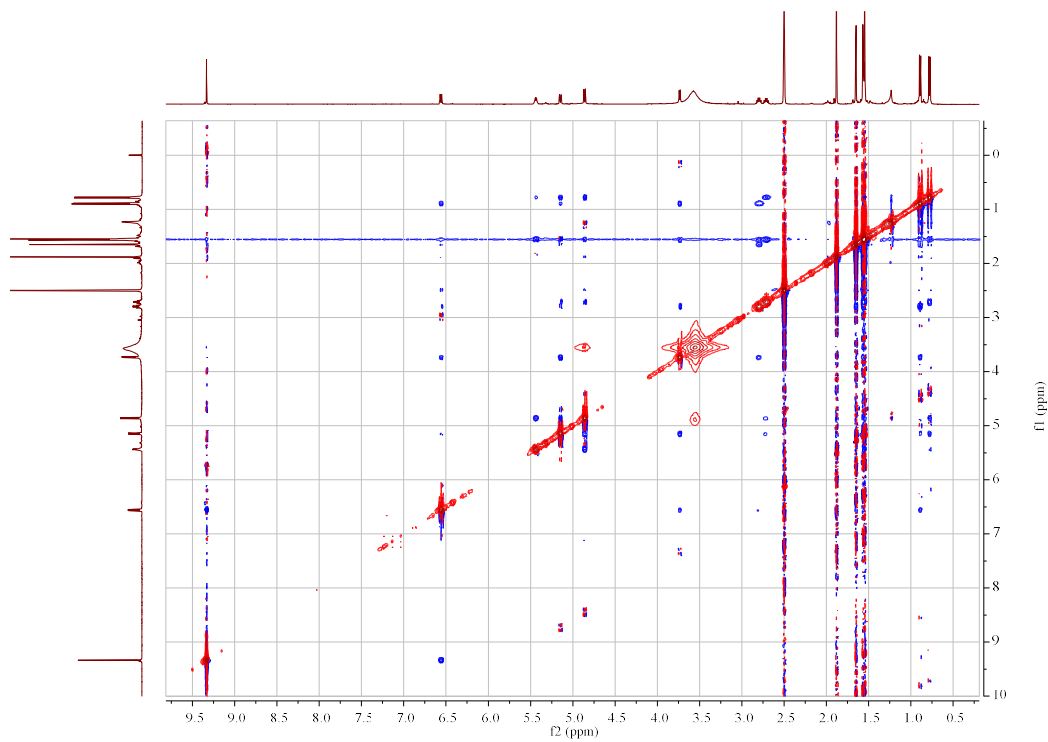

**Figure S6.** NOESY spectrum of aspormisin A (**1**).

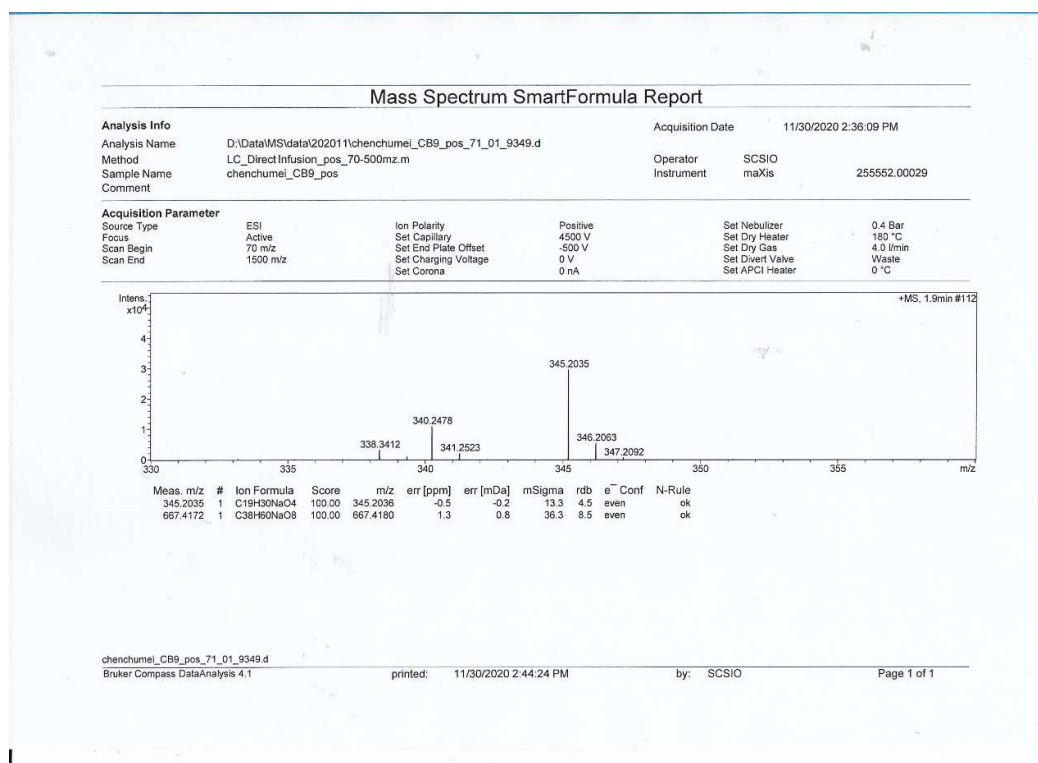

**Figure S7.** HRESIMS spectrum of aspormisin A (1).

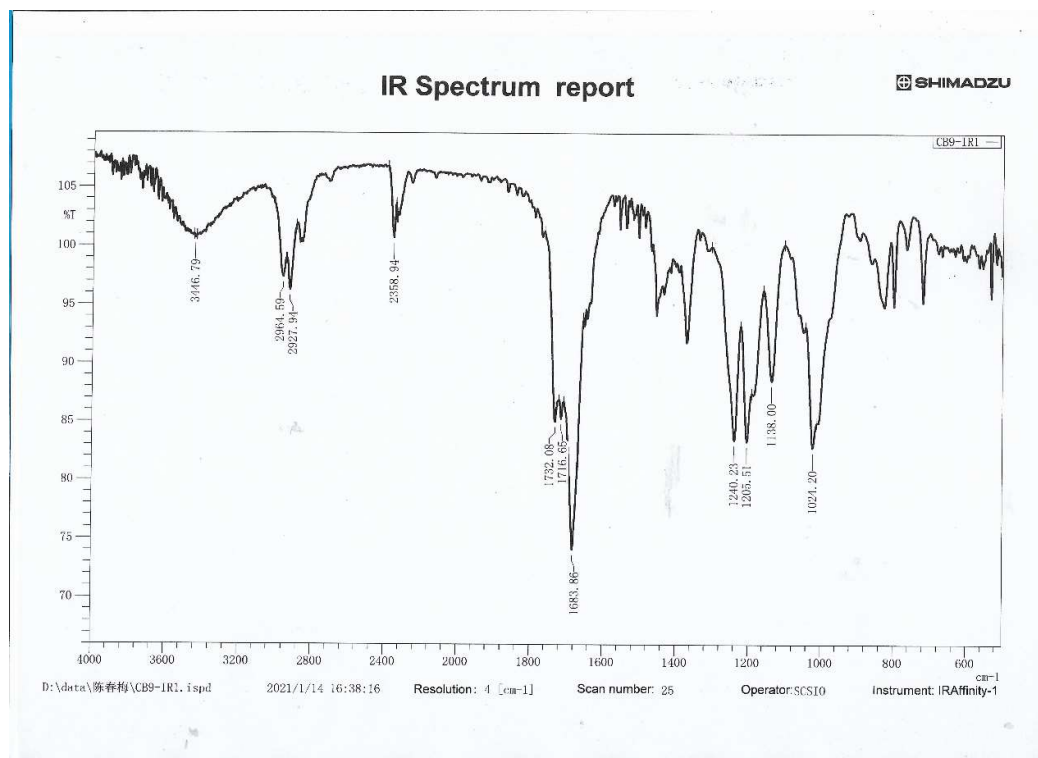

**Figure S8.** IR spectrum of aspormisin A (1).

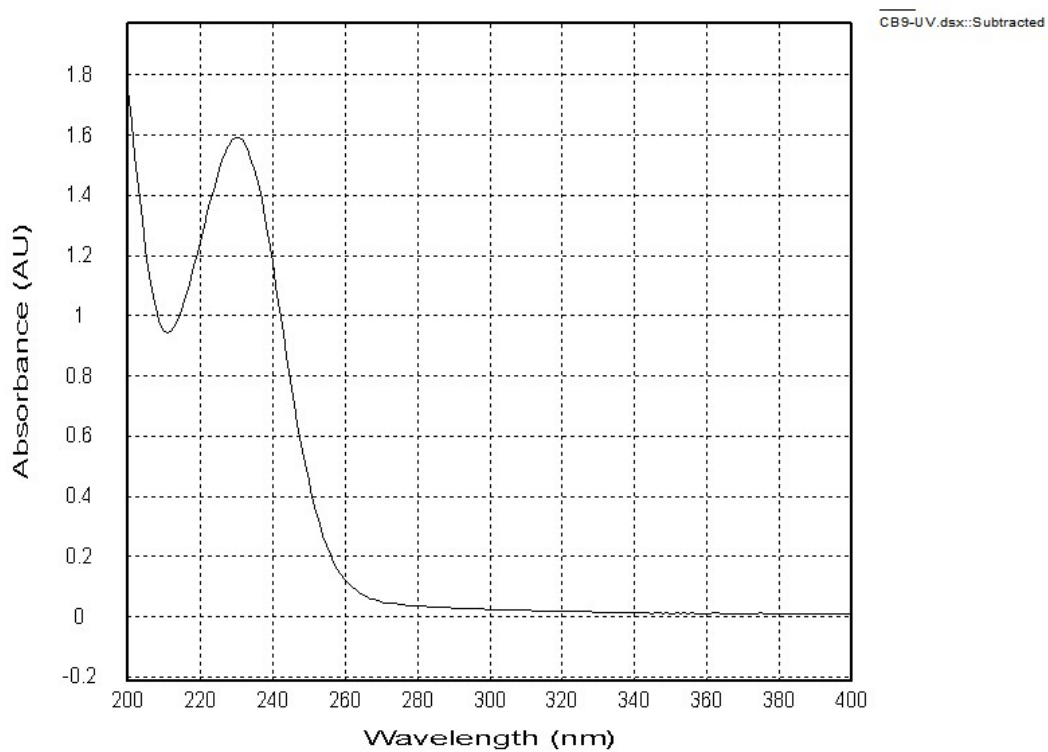

**Figure S9.** UV spectrum of aspormisin A (**1**) in MeOH.

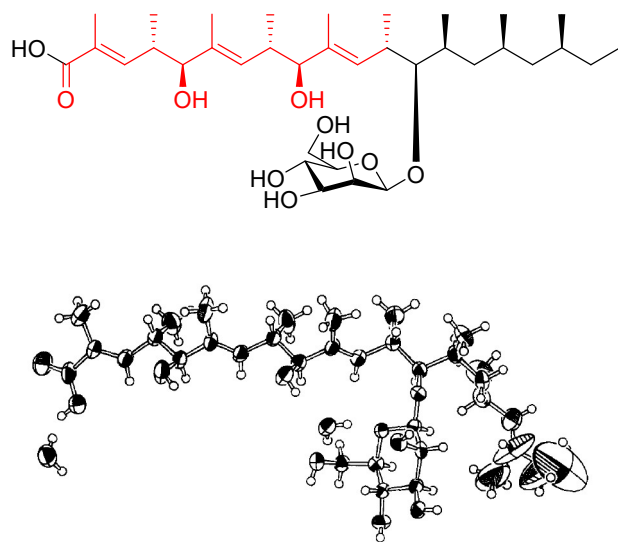

**Figure S10.** The structure and ORTEP diagram of TMC-151s. (Tetrahedron 1999, 55, 7771-7786.)



## ECD Calculation Details for 2.

**Table S1.** Energies of **2** at MMFF94 force field.

| Configuration | Conformer | Energy (kcal/mol) | Population (%) |
|---------------|-----------|-------------------|----------------|
| 2             | 1         | 225.35            | 42.4           |
| 2             | 2         | 225.44            | 40.9           |
| 2             | 3         | 229.58            | 7.7            |
| 2             | 4         | 230.56            | 5.2            |
| 2             | 5         | 234.09            | 1.2            |
| 2             | 6         | 235.65            | 0.7            |
| 2             | 7         | 237.29            | 0.3            |
| 2             | 8         | 237.46            | 0.3            |
| 2             | 9         | 237.73            | 0.3            |
| 2             | 10        | 239.38            | 0.1            |

**Table S2.** Energies of **2** at B3LYP/6–31+g(d) level in methanol.

| Configuration | Conformer | E (Hartree)  | E (kcal/mol)      | Population (%) |
|---------------|-----------|--------------|-------------------|----------------|
| 2             | 1         | –890.5628954 | –558837.122492454 | 7.04           |
| 2             | 2         | –890.559812  | –558835.18762812  | 0.27           |
| 2             | 3         | –890.5592548 | –558834.837979548 | 0.15           |
| 2             | 4         | –890.5599427 | –558835.269643677 | 0.31           |
| 2             | 5         | –890.5620908 | –558836.617597908 | 3.00           |
| 2             | 6         | –890.5652041 | –558838.571224791 | 81.41          |
| 2             | 7         | –890.5586898 | –558834.483436398 | 0.07           |
| 2             | 8         | –890.5627066 | –558837.004018566 | 5.77           |
| 2             | 9         | –890.5616937 | –558836.368413687 | 1.97           |
| 2             | 10        | –890.5566407 | –558833.197605657 | 0.01           |

2

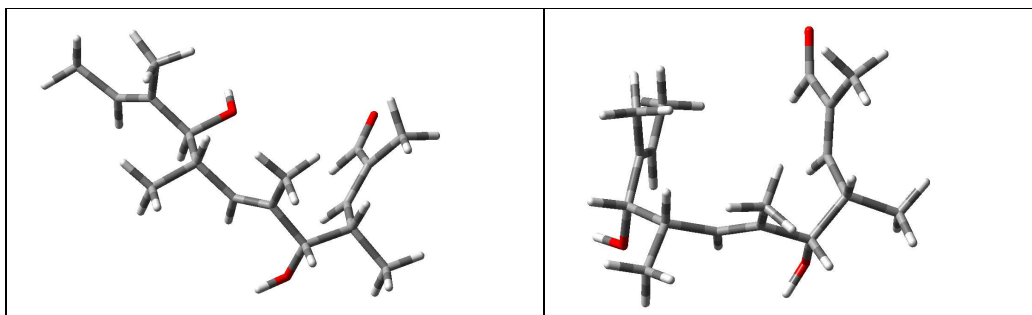

|                                                                                     |                                                                                      |
|-------------------------------------------------------------------------------------|--------------------------------------------------------------------------------------|
| Conf.1 (7.04%)                                                                      | Conf.2 (0.27%)                                                                       |
| 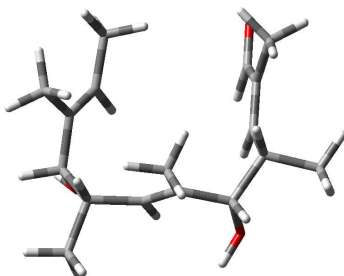   |    |
| Conf.3 (0.15%)                                                                      | Conf.4 (0.31%)                                                                       |
|    |    |
| Conf.5 (3.00%)                                                                      | Conf.6 (81.41%)                                                                      |
|   |   |
| Conf.7 (0.07%)                                                                      | Conf.8 (5.77%)                                                                       |
|  |  |
| Conf.9 (1.97%)                                                                      | Conf.10 (0.01%)                                                                      |

**Figure S11.** The The optimized conformers and equilibrium populations of **2**.

**The strain's (*Aspergillus ochraceopetaliformis* SCSIO 41020) ITS sequence of the rDNA**

TCCTCCGCTTATTGATATGCTTAAGTTCAGCGGGTATCCCTACcTGATCGAGGTCACCTGG  
AGAATAATGGTTGCTTTTCAGCGTCGGCCAGCGCCGGCCGGGCCTACGAGAGCGGTGT  
GACAAAGCCCCATACGCTCGAGGACCGGACGCGGTGCCGCCGCTGCCTTTCGGGCCCC  
TCCCCCGGGGGGACGAGGACCCAACACACAAGCCGGGCTTGAGGGCAGCAATGACG  
CTCGGACAGGCATACCCCCCGGAATACCAGGGGGTGCAATGTGCGTTCAAAGACTCGAT  
GATTCAGTGAATTCTGCAATTCACATTAATTATCGCATTTTCGCTGCGTTCTTCATCGATGC  
CGGAACCAAGAGATCCATTGTTGAAAGTTTTAACTGATTGCGATACAATCGAACTCAGA  
CGACAAAACCTTCAGACAGTGTTACGTTGGGGTCTCCGGCGGGCGCTCGCCCGGGGGG  
AGGGGTTCCCCCCCCGGCGGCCGCGCAACGCGGGCCCGCCGAAGCAACTTGGTACA  
GTATACAAGGGTGGGAGGTtGGGCCCCGAAGGAACCCTCACTCAGTAATGATCCTTCCG  
CAGGTTACCTACGGAAG

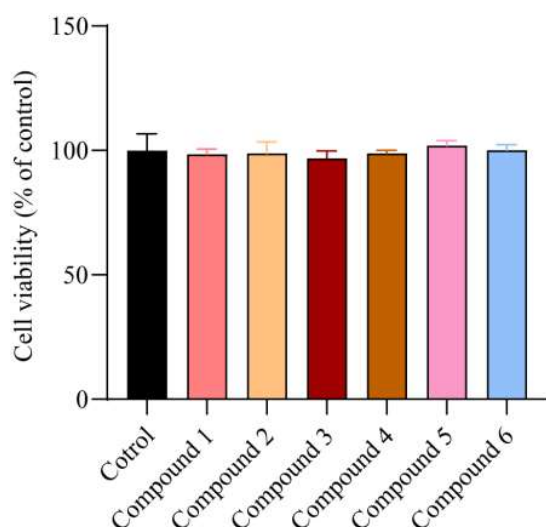

**Figure S12. Effect on cell viability of compounds 1–6 in RAW264.7 cells at the dose of 10  $\mu$ M.** Cells were exposed to compounds 1– 6 (10  $\mu$ M) for 24 h, respectively. All data are presented as the mean  $\pm$  SD of three independent experiments, n=6.

**Table S3. Primers used in qPCR.**

| Name           | Species | Forward (5'-3')         | Reverse (5'-3')         |
|----------------|---------|-------------------------|-------------------------|
| IL-6           | Mice    | CCGGAGAGGAGACTTCACAG    | TGGTCTTGGTCCTTAGCCAC    |
| iNOS           | Mice    | CCTTACGAGGCGAAGAAGGACAG | CAGTTTGAGAGAGGAGGCTCCG  |
| Tnf- $\alpha$  | Mice    | GACCCTCACACTCAGATCAT    | TTGAAGAGAACCTGGGAGTA    |
| Cox2           | Mice    | CATCCCCCTTCGCGAAGTT     | CATGGGAGTTGGGCAGTCAT    |
| IL-1 $\beta$   | Mice    | TTCCCCAGGGCATGTTAAGG    | GTCTTGGCCGAGGACTAAGG    |
| Mcp-1          | Mice    | TTAAAAACCTGGATCGGAACCAA | GCATTAGCTTCAGATTTACGGGT |
| $\beta$ -actin | Mice    | AACTGTGCCCATCTACGAG     | CAGCACTGTGTTGGCATAGAG   |
